# Supplementary material
Source: Springer Nature journal article supplement (https://www.springermedizin.de/resource/supplementary/13054_2012_619_MOESM6_ESM.pdf/9708790)

MB

(a)

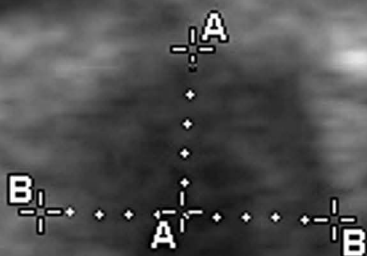

A 0.30cm

B 0.55cm

3.5

Supplement: MOESM6 [file 9708790]
